# Supplementary material
Source: PubMed Central journal article supplement (PMC4779374)
Supplement: NIHMS752604-supplement.pdf [file NIHMS752604-supplement.pdf]

464

$$k = k_0 \left( \frac{J - \varphi_f^0}{1 - \varphi_f^0} \right)^2 e^{-M(I_3 - 1)/2} \quad (3)$$

465 where  $k_0$  is the reference permeability,  $M$  is the non-linearity parameter, and  $I_3$  is the 3<sup>rd</sup> strain invariant,  
 466 defined as  $I_3 = \det \mathbf{C}$  where  $\mathbf{C}$  is the right Cauchy-Green deformation tensor. The osmotic pressure was  
 467 calculated as a function of the tissue's fixed charge density and bath osmolarity (Cortes and Elliott, 2012).

468 The elastic ( $E$ ,  $\nu$ ,  $\beta$ ) and permeability ( $k_0$ ,  $M$ ) properties were obtained by curve-fitting the full  
 469 experimental load curves to the biphasic-swelling model using FEBio's built-in Levenberg-Marquardt  
 470 algorithm (Cortes et al., 2014a). Briefly, the full confined compression experiment in PBS was simulated  
 471 generating a reaction force curve that was compared to the experimental load curve. The material  
 472 properties were solved iteratively by minimizing the difference between the FE-generated and  
 473 experimental load curves. Pilot testing for a previous study demonstrated that the optimization procedure  
 474 produced a unique set of parameters (Cortes et al., 2014a). The quality of the curve fits was analyzed by  
 475 calculating the coefficient of determination,  $R^2$ .

#### 476 **Appendix: Supplemental Tables**

477 **Supplemental Table 1: Summary of sample set by degeneration grade. Some discs only had 1 usable**  
 478 **CEP from levels L1L2 or L2L3 and were labeled as "unpaired".**

| Degeneration Type      | Non-Degenerate (Grade 1 and 2) | Degenerate (Grade 3) | <b>Total</b> |
|------------------------|--------------------------------|----------------------|--------------|
| Number of Paired CEP   | 14                             | 12                   | <b>26</b>    |
| Number of Unpaired CEP | 1                              | 3                    | <b>4</b>     |
| <b>Total CEP</b>       | <b>15</b>                      | <b>15</b>            | <b>30</b>    |

479

480

481 **Supplemental Table 2: Correlations between parameters and NP T2 Time, a continuous measure of**  
 482 **degeneration. Data was first analyzed in groups by disc level before ultimately all data analyzed**  
 483 **together.**

| Correlations with NP T2 Time |              |                      |          |          |          |
|------------------------------|--------------|----------------------|----------|----------|----------|
| Permeability                 |              | Fixed Charge Density |          | Modulus  |          |
| Inferior                     | Superior     | Inferior             | Superior | Inferior | Superior |
| $p < 0.05^*$                 | $p < 0.1^\#$ | $p < 0.1^\#$         | ns       | ns       | ns       |
| $p < 0.05^*$                 |              | $p < 0.05^*$         |          | ns       |          |

484

485

486

487 **Supplemental Table 3: Correlations between parameters and age. Data was first analyzed in groups**  
 488 **by disc level before ultimately all data analyzed together.**

| Correlations with Age |          |                      |          |          |          |
|-----------------------|----------|----------------------|----------|----------|----------|
| Permeability          |          | Fixed Charge Density |          | Modulus  |          |
| Inferior              | Superior | Inferior             | Superior | Inferior | Superior |
| $p < 0.1^\#$          | ns       | ns                   | ns       | ns       | ns       |
| $p < 0.05^*$          |          | ns                   |          | ns       |          |

489

490

491

492 **References**

493 Antoniou, J., N. Goudsouzian, T. Heathfield, N. Winterbottom, T. Steffen, A. Poole, M. Aebi,  
 494 and M. Alini. 1996. The Human Lumbar Endplate. *Spine (Phila Pa 1976)*. 21:1153-1161.

495

496 Armstrong, C.G., and V.C. Mow. 1982. Variations in the intrinsic mechanical properties of  
 497 human articular cartilage with age, degeneration, and water content. *Journal of Bone and Joint*  
 498 *Surgery*. 64:88-94.

499
